# Supplementary material for: Changes in Circulating Metabolites during Weight Loss and Weight Loss Maintenance in Relation to Cardiometabolic Risk
Source: MDPI journal article supplement (doi:10.3390/nu13124289), 2021-11-27
Supplement: s1 [file s1]

## **Supplemental Methods**

### **Multiplatform targeted metabolomics**

#### *Automated multiple plasma sample extraction*

The Bravo Automated Liquid Handling Platform from Agilent Technologies was used to extract plasma samples in 96-well format plates. For GC-HRMS analysis, a protein precipitation extraction will be made by adding 400 of  $\mu\text{L}$  MeOH: H<sub>2</sub>O (8: 1) mixture to a volume of 100  $\mu\text{L}$  of plasma. The mixture was stirred and centrifuged and the supernatants were collected in new 96 well plates that contain internal standard mixture. This plate was evaporated to dryness with a vacuum centrifugation system (Speed Vac) and dried extracts were reconstituted with 30  $\mu\text{L}$  of methoxyamine and incubated during 90 min at 37°C. Finally, the metabolites were silylated with 45  $\mu\text{L}$  of MSTFA + 1 % TMCS at room temperature during 60 min.

For LC-HRMS analysis and NMR analyses, lipidic fraction was obtained by a liquid-liquid extraction using a methanol/methyl-tert-butyl ether mixture. These solvents were automatically and sequentially added to a volume of 100  $\mu\text{L}$  of plasma with agitation stages between them and final centrifugation to promote phase separation. Then, a small aliquot of the supernatant (organic phase) was dispensed and diluted 1:10 with methanol in a new 96-well plates containing deuterated internal standards for each family of lipids (Lipidomix SPLASH from Avanti Polar Lipid) for lipidomic analysis using liquid chromatography coupled to a time of flight high resolution mass spectrometry (LC-HRMS).

For lipidomic analysis by Nuclear Magnetic Resonance (NMR), a second aliquot of the supernatant (organic phase) was dispensed in new 96 well plates that was evaporated to dryness with Speed Vac. Afterwards, they were reconstituted with a solution of

CD<sub>3</sub>Cl: CD<sub>3</sub>OD with 4% D<sub>2</sub>O and 0.01% TMS (0.067 mM, Eretic Signal 6,166 mM) and analyzed by proton NMR (<sup>1</sup>H-NMR).

#### *GC-HRMS metabolomics profiling*

Samples were analyzed in a 7890A Series gas chromatograph coupled to a 7000 GC-qTOF from Agilent Technologies using a chromatographic column J&W Scientific HP5-MS (30 m x 0.25 mm i.d., 0.25 µm film) (Agilent Technologies), and helium as a carrier gas. Ionization was done by electronic impact (EI), recording data in Full Scan mode. Quantification was performed by internal standard calibration, using the corresponding analytical standard for each determined metabolite and a deuterated internal standard depending on the family of metabolite. Internal standards used were succinic acid-d<sub>4</sub>, glycerol-13C<sub>3</sub>, norvaline, L-methionine-(carboxy-13C, methyl-d<sub>3</sub>), D-glucose-13C<sub>6</sub>, myristic-d<sub>27</sub> acid and alpha-tocopherol-d<sub>6</sub>.

#### *LC-HRMS lipidomics profiling*

The lipid species were determined using UHPLC-qTOF from Agilent Technologies (6550). The ionization was performed in positive electrospray and mass calibration reference was used along all the analyses to maintain the mass accuracy below 5 ppm. Lipids were separated on C18 reversed phase column (Kinetex C18-EVO, Phenomenex) and a ternary mobile phase (water/methanol/2-propanol) was used. The quantification of each lipid was made by an internal standard calibration method using one analytical standard and one deuterated internal standard for each lipid family (lysophosphatidylcholines, phosphatidylcholines, sphingomyelins, and triglycerides).

#### *<sup>1</sup>H-NMR lipidomic profiling*

<sup>1</sup>H NMR spectra were recorded at 300K on an Avance III 600 spectrometer (Bruker®, Germany) operating at a proton frequency of 600.20 MHz using a 5 mm PBBO gradient probe. Lipidic samples were measured and recorded in procno 11 using a simple

presaturation sequence (RD-90°-ACQ zgpr pulse program in Bruker®) to eliminate the residual water moisture of deuterated methanol. Solvent presaturation with irradiation power of 50 Hz was applied during recycling delay (RD = 5 s) and mixing time. The 90° pulse length was calibrated for each sample and varied from 10.42 to 11.49 ms. The spectral width was 12 kHz (20 ppm), and a total of 64 transients were collected into 64 k data points for each <sup>1</sup>H spectrum. The exponential line broadening applied before Fourier transformation was of 0.3 Hz. The frequency domain spectra were manually phased and baseline-corrected using TopSpin software (version 2.1, Bruker). After pre-processing and visual checking of NMR dataset, specific <sup>1</sup>H regions of diacylglycerols, triglycerides and total lipids based on terminal methyl and methylene signals were identified by in the spectra using a comparison into AMIX 3.9 software. Curated identified regions across the spectra were integrated using the same AMIX 3.9 software package and exported to Excel spreadsheet in order to give absolute concentrations.

Metabolite quantification and data normalization in MS analysis: A pooled matrix sample generated by taking a small volume of each experimental sample served as a technical replicate throughout the data set. As study spanning multiple days, a data normalization step is performed to correct variation resulting from instrument inter-day tuning differences. Essentially, each compound was corrected in run-day blocks through quality controls (QCs) normalizing each data point proportionately.

Metabolite quantification and data normalization in NMR analysis: The calibration of the quantification in NMR was performed using the PULCON (PULse length-based CONcentration determination) methodology (ERETIC®), which is based on the principle of reciprocity. The stability, reproducibility and quantitative nature of the NMR technique allows the use of PULCON method to quantify different batches of

samples without any further quality control correction. The PULCON method requires only one measurement of an external reference sample (in eg. 2mM sucrose solution in D<sub>2</sub>O + H<sub>2</sub>O) used to calibrate ERETIC signal for all samples. This reference virtual signal, thanks to the stability of modern NMR instruments, can be used for several months.

**Figure S1** Flow chart of study participants

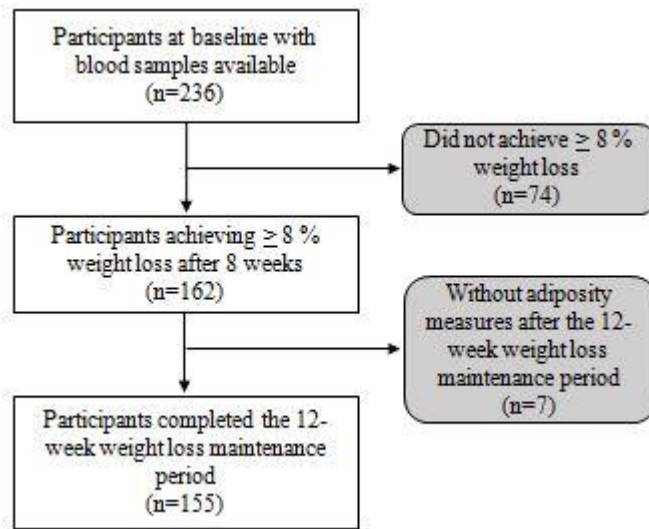

**Table S1** List of metabolites identified

| Metabolite                             | Platform | Quantitative ion (m/z) | Retention Time (min) | Repeatability (% RSD, n=5)* | Reproducibility (% RSD, n=3)* |
|----------------------------------------|----------|------------------------|----------------------|-----------------------------|-------------------------------|
| 2-Hydroxybutanoic acid in plasma       | GC-MS    | 131.0895               | 6.9                  | 3.4                         | 4.2                           |
| 3-Hydroxybutanoic acid in plasma       | GC-MS    | 117.0731               | 7.3                  | 2.0                         | 2.7                           |
| Alanine in plasma                      | GC-MS    | 116.0916               | 6.5                  | 3.6                         | 3.7                           |
| alpha-Tocopherol in plasma             | GC-MS    | 237.1337               | 26.3                 | 2.5                         | 7.6                           |
| Cholesterol in plasma                  | GC-MS    | 129.0746               | 26.4                 | 4.8                         | 11.9                          |
| Citric acid in plasma                  | GC-MS    | 273.105                | 15.7                 | 1.4                         | 8.0                           |
| Fructose in plasma                     | GC-MS    | 307.165                | 16.4                 | 3.7                         | 19.7                          |
| Glyceric acid in plasma                | GC-MS    | 189.0782               | 9.8                  | 3.3                         | 8.0                           |
| Glucose in plasma                      | GC-MS    | 319.1592               | 16.6                 | 4.6                         | 19.8                          |
| Glutamic acid in plasma                | GC-MS    | 246.1392               | 13.4                 | 2.2                         | 4.2                           |
| Glycerol in plasma                     | GC-MS    | 218.1185               | 9                    | 5.5                         | 6.1                           |
| Glycine in plasma                      | GC-MS    | 174.1153               | 9.4                  | 1.4                         | 1.9                           |
| Glycolic acid in plasma                | GC-MS    | 177.0764               | 6                    | 2.2                         | 11.8                          |
| Isoleucine in plasma                   | GC-MS    | 158.1404               | 9.2                  | 1.5                         | 3.4                           |
| Lactic acid in plasma                  | GC-MS    | 190.088                | 5.8                  | 3.6                         | 5.6                           |
| Leucine in plasma                      | GC-MS    | 158.1432               | 8.9                  | 1.7                         | 1.7                           |
| Linoleic acid in plasma                | GC-MS    | 117.0382               | 19.2                 | 6.5                         | 16.5                          |
| Lysine in plasma                       | GC-MS    | 200.1102               | 16                   | 8.5                         | 18.7                          |
| Methionine in plasma                   | GC-MS    | 128.0909               | 12.2                 | 4.4                         | 3.9                           |
| Oleic acid in plasma                   | GC-MS    | 117.0382               | 19.3                 | 2.4                         | 13.6                          |
| Ornithine in plasma                    | GC-MS    | 142.1063               | 15.6                 | 3.3                         | 9.4                           |
| Palmitic acid in plasma                | GC-MS    | 117.0382               | 17.7                 | 4.7                         | 9.3                           |
| Phenylalanine in plasma                | GC-MS    | 218.105                | 13.5                 | 2.8                         | 0.5                           |
| Proline in plasma                      | GC-MS    | 142.1082               | 9.3                  | 6.4                         | 22.5                          |
| Serine in plasma                       | GC-MS    | 204.1316               | 10.2                 | 1.4                         | 2.0                           |
| Stearic acid in plasma                 | GC-MS    | 117.0382               | 19.5                 | 2.9                         | 17.6                          |
| Threonine in plasma                    | GC-MS    | 218.1053               | 10.6                 | 1.2                         | 2.8                           |
| Tryptophan in plasma                   | GC-MS    | 202.1134               | 19.5                 | 7.9                         | 14.3                          |
| Tyrosine in plasma                     | GC-MS    | 179.0902               | 16.9                 | 3.8                         | 26.2                          |
| Valine in plasma                       | GC-MS    | 144.1229               | 8.1                  | 2.3                         | 2.7                           |
| Lysophosphatidylcholine 14:0 in plasma | LC-MS    | 468.3085               | 1.3                  | 3.8                         | 0.4                           |
| Lysophosphatidylcholine 15:0 in plasma | LC-MS    | 482.3241               | 1.5                  | 3.7                         | 0.8                           |

|                                          |       |          |     |     |     |
|------------------------------------------|-------|----------|-----|-----|-----|
| Lysophosphatidylcholine 16:0 e in plasma | LC-MS | 482.3605 | 1.9 | 4.3 | 2.1 |
| Lysophosphatidylcholine 16:0 in plasma   | LC-MS | 496.3398 | 1.8 | 4.2 | 1.0 |
| Lysophosphatidylcholine 16:1 e in plasma | LC-MS | 480.3449 | 2   | 3.1 | 6.2 |
| Lysophosphatidylcholine 16:1 in plasma   | LC-MS | 494.3241 | 1.5 | 5.6 | 7.5 |
| Lysophosphatidylcholine 17:0 in plasma   | LC-MS | 510.3554 | 2   | 4.3 | 1.2 |
| Lysophosphatidylcholine 18:0 e in plasma | LC-MS | 510.3918 | 2.5 | 3.8 | 1.2 |
| Lysophosphatidylcholine 18:0 in plasma   | LC-MS | 524.3711 | 2.2 | 2.3 | 1.5 |
| Lysophosphatidylcholine 18:1 in plasma   | LC-MS | 522.3554 | 1.9 | 3.1 | 1.2 |
| Lysophosphatidylcholine 18:2 in plasma   | LC-MS | 520.3398 | 1.6 | 3.0 | 1.1 |
| Lysophosphatidylcholine 20:0 in plasma   | LC-MS | 552.4024 | 2.7 | 4.1 | 1.5 |
| Lysophosphatidylcholine 20:1 in plasma   | LC-MS | 550.3867 | 2.3 | 3.8 | 1.6 |
| Lysophosphatidylcholine 20:3 in plasma   | LC-MS | 546.3554 | 1.8 | 5.1 | 2.3 |
| Lysophosphatidylcholine 20:4 in plasma   | LC-MS | 544.3398 | 1.7 | 4.9 | 1.8 |
| Lysophosphatidylcholine 22:6 in plasma   | LC-MS | 568.3398 | 1.7 | 3.9 | 1.2 |
| Phosphatidylcholine 30:0 in plasma       | LC-MS | 706.5381 | 4.1 | 2.9 | 2.3 |
| Phosphatidylcholine 32:0 in plasma       | LC-MS | 734.5694 | 4.7 | 4.3 | 3.1 |
| Phosphatidylcholine 32:1 e in plasma     | LC-MS | 718.5745 | 4.7 | 4.2 | 3.2 |
| Phosphatidylcholine 32:1 in plasma       | LC-MS | 732.5538 | 4.2 | 3.9 | 2.7 |
| Phosphatidylcholine 32:2 in plasma       | LC-MS | 730.5381 | 3.9 | 3.2 | 2.5 |
| Phosphatidylcholine 33:1 in plasma       | LC-MS | 746.5694 | 4.5 | 3.7 | 3.0 |
| Phosphatidylcholine 34:0 in plasma       | LC-MS | 762.6008 | 5.5 | 3.7 | 3.6 |
| Phosphatidylcholine 34:1 e in plasma     | LC-MS | 746.6058 | 5.4 | 7.5 | 3.2 |
| Phosphatidylcholine 34:2 e in plasma     | LC-MS | 744.5918 | 5.1 | 3.6 | 2.8 |
| Phosphatidylcholine 34:2 in plasma       | LC-MS | 758.5694 | 4.5 | 3.6 | 2.8 |
| Phosphatidylcholine 34:3 e in plasma     | LC-MS | 742.5778 | 4.8 | 3.3 | 2.7 |
| Phosphatidylcholine 34:4 in plasma       | LC-MS | 754.5381 | 4   | 4.2 | 2.4 |
| Phosphatidylcholine 35:1 in plasma       | LC-MS | 774.6007 | 5.3 | 3.8 | 3.5 |
| Phosphatidylcholine 35:2 in plasma       | LC-MS | 772.5851 | 5   | 2.6 | 3.2 |
| Phosphatidylcholine 36:1 in plasma       | LC-MS | 788.6164 | 5.8 | 7.8 | 3.8 |
| Phosphatidylcholine 36:2 e in plasma     | LC-MS | 772.6215 | 5.1 | 2.7 | 3.6 |
| Phosphatidylcholine 36:3 in plasma       | LC-MS | 784.5851 | 4.8 | 3.2 | 3.0 |
| Phosphatidylcholine 36:4 e in plasma     | LC-MS | 768.5902 | 5   | 3.2 | 3.0 |
| Phosphatidylcholine 36:5 e in plasma     | LC-MS | 766.5762 | 4.7 | 3.5 | 2.8 |
| Phosphatidylcholine 36:5 in plasma       | LC-MS | 780.5538 | 4.3 | 3.5 | 2.8 |
| Phosphatidylcholine 37:4 in plasma       | LC-MS | 796.5851 | 5   | 4.5 | 2.8 |
| Phosphatidylcholine 38:3 in plasma       | LC-MS | 812.6164 | 5.6 | 7.3 | 3.7 |
| Phosphatidylcholine 38:4 e in plasma     | LC-MS | 796.6215 | 5.9 | 2.6 | 3.6 |
| Phosphatidylcholine 38:4 in plasma       | LC-MS | 810.6007 | 5.4 | 2.6 | 3.6 |

|                                           |       |          |      |      |     |
|-------------------------------------------|-------|----------|------|------|-----|
| Phosphatidylcholine 38:5 e in plasma      | LC-MS | 794.6058 | 5.2  | 3.6  | 3.4 |
| Phosphatidylcholine 38:5 in plasma        | LC-MS | 808.5851 | 5    | 3.6  | 3.4 |
| Phosphatidylcholine 38:6 in plasma        | LC-MS | 806.5694 | 4.4  | 5.0  | 3.0 |
| Phosphatidylcholine 40:4 e in plasma      | LC-MS | 824.6528 | 6.4  | 3.9  | 4.1 |
| Phosphatidylcholine 40:4 in plasma        | LC-MS | 838.632  | 6    | 3.9  | 4.1 |
| Phosphatidylcholine 40:5 e in plasma      | LC-MS | 822.6371 | 5.9  | 4.9  | 3.8 |
| Phosphatidylcholine 40:6 in plasma        | LC-MS | 834.6007 | 5.4  | 3.8  | 3.6 |
| Phosphatidylcholine 42:5 e in plasma      | LC-MS | 850.6684 | 6.4  | 5.3  | 4.9 |
| Phosphatidylethanolamine 36:5 e in plasma | LC-MS | 724.5276 | 4.4  | 7.6  | 4.9 |
| Phosphatidylethanolamine 38:5 e in plasma | LC-MS | 752.5589 | 5.5  | 7.7  | 6.1 |
| Phosphatidylethanolamine 38:6 e in plasma | LC-MS | 750.5449 | 5.2  | 6.4  | 4.7 |
| Sphingomyelin 32:1 in plasma              | LC-MS | 675.5436 | 3.5  | 4.6  | 1.8 |
| Sphingomyelin 32:2 in plasma              | LC-MS | 673.5279 | 3.3  | 3.1  | 1.7 |
| Sphingomyelin 33:1 in plasma              | LC-MS | 689.5592 | 3.7  | 3.0  | 2.1 |
| Sphingomyelin 34:1 in plasma              | LC-MS | 703.5749 | 4    | 5.3  | 2.2 |
| Sphingomyelin 34:2 in plasma              | LC-MS | 701.5592 | 3.7  | 2.6  | 2.1 |
| Sphingomyelin 35:1 in plasma              | LC-MS | 717.5905 | 4.4  | 3.0  | 2.6 |
| Sphingomyelin 36:0 in plasma              | LC-MS | 733.6218 | 4.8  | 11.6 | 3.0 |
| Sphingomyelin 36:1 in plasma              | LC-MS | 731.6062 | 4.6  | 3.6  | 2.6 |
| Sphingomyelin 36:2 in plasma              | LC-MS | 729.5905 | 4.2  | 4.8  | 3.1 |
| Sphingomyelin 38:1 in plasma              | LC-MS | 759.6375 | 5.4  | 3.1  | 3.5 |
| Sphingomyelin 38:2 in plasma              | LC-MS | 757.6218 | 4.8  | 3.1  | 3.0 |
| Sphingomyelin 40:1 in plasma              | LC-MS | 787.6688 | 6.2  | 4.4  | 4.2 |
| Sphingomyelin 40:2 in plasma              | LC-MS | 785.6531 | 5.7  | 4.3  | 3.8 |
| Sphingomyelin 41:1 in plasma              | LC-MS | 801.6844 | 6.3  | 4.1  | 3.2 |
| Sphingomyelin 41:2 in plasma              | LC-MS | 799.6688 | 6.1  | 3.8  | 4.1 |
| Sphingomyelin 42:1 in plasma              | LC-MS | 815.7001 | 6.5  | 2.1  | 1.3 |
| Sphingomyelin 42:2 in plasma              | LC-MS | 813.6844 | 6.2  | 4.2  | 4.8 |
| Sphingomyelin 42:3 in plasma              | LC-MS | 811.6688 | 5.8  | 4.2  | 5.6 |
| Triacylglycerides 50:1 in plasma          | LC-MS | 850.7858 | 9.7  | 13.6 | 5.7 |
| Triacylglycerides 50:2 in plasma          | LC-MS | 848.7702 | 9.3  | 12.2 | 5.4 |
| Triacylglycerides 50:3 in plasma          | LC-MS | 846.7545 | 8.9  | 6.2  | 5.3 |
| Triacylglycerides 52:2 in plasma          | LC-MS | 876.8015 | 9.8  | 16.9 | 7.7 |
| Triacylglycerides 52:3 in plasma          | LC-MS | 874.7858 | 9.4  | 8.4  | 6.3 |
| Triacylglycerides 52:4 in plasma          | LC-MS | 872.7702 | 9.1  | 15.8 | 5.7 |
| Triacylglycerides 54:2 in plasma          | LC-MS | 904.8328 | 10.3 | 12.6 | 8.2 |
| Triacylglycerides 54:3 in plasma          | LC-MS | 902.8171 | 10   | 13.7 | 7.9 |
| Triacylglycerides 54:4 in plasma          | LC-MS | 900.8015 | 9.6  | 15.1 | 6.7 |



|                                                   |       |          |     |     |      |
|---------------------------------------------------|-------|----------|-----|-----|------|
| Triacylglycerides 54:5 in plasma                  | LC-MS | 898.7858 | 9.2 | 5.3 | 5.8  |
| Fatty acyl chains in serum                        | NMR   | -        | -   | 3.3 | 9.1  |
| Total Cholesterol in serum                        | NMR   | -        | -   | 3.8 | 10.4 |
| Esterified Cholesterol in serum                   | NMR   | -        | -   | 4.0 | 10.1 |
| Phosphatidyl Choline in serum                     | NMR   | -        | -   | 2.9 | 9.6  |
| Lysophosphatidyl Choline in serum                 | NMR   | -        | -   | 2.7 | 7.9  |
| Free Cholesterol in serum                         | NMR   | -        | -   | 3.5 | 11.2 |
| Triglycerides in serum                            | NMR   | -        | -   | 3.6 | 10.2 |
| Sphingomyelin in serum                            | NMR   | -        | -   | 2.9 | 12.6 |
| monounsaturated fatty acids in serum              | NMR   | -        | -   | 3.9 | 11.3 |
| polyunsaturated fatty acids in serum              | NMR   | -        | -   | 3.7 | 11.5 |
| Linoleic in serum                                 | NMR   | -        | -   | 4.0 | 11.3 |
| Arachidonic acid + Eicosapentaenoic acid in serum | NMR   | -        | -   | 3.8 | 4.4  |
| Omega-3 in serum                                  | NMR   | -        | -   | 3.8 | 4.4  |
| Docosahexaenoic acid in serum                     | NMR   | -        | -   | 3.7 | 6.8  |

\*Repeatability and reproducibility (expressed as RSD) were evaluated with a pool of well-characterized human plasma prepared and analyzed on the same day (repeatability) and three different days (reproducibility).

**Table S2.** Baseline characteristics of 236 participants initially recruited in the SATIN study and 162 participants included in the present analyses

| <b>Variables</b>                | <b>n=236</b>   | <b>n=162</b>   |
|---------------------------------|----------------|----------------|
| <b>Sex</b> (% Women)            | 78.8           | 75.0           |
| <b>Age</b> (years)              | 46.4           | 47.5 ± 9.9     |
| <b>Weight</b> (kg)              | 87.5 ± 11.2    | 88.1 ± 10.7    |
| <b>BMI</b> (kg/m <sup>2</sup> ) | 31.1 ± 2.2     | 30.9 ± 2.0     |
| <b>Sagittal diameter</b> (cm)   | 23.1 ± 2.3     | 23.2 ± 2.4     |
| <b>Glucose</b> (mg/dL)          | 93.3 ± 11.0    | 94.9 ± 11.2    |
| <b>Insulin</b> (mcUI/mL)        | 10.2 ± 8.8     | 9.1 ± 6.4      |
| <b>HOMA-IR</b>                  | 2.4 ± 2.2      | 2.2 ± 1.7      |
| <b>TChol</b> (mg/dL)            | 196.0 ± 34.9   | 197.6 ± 34.9   |
| <b>HDL-C</b> (mg/dL)            | 55.7 ± 15.3    | 56.3 ± 15.9    |
| <b>LDL-C</b> (mg/dL)            | 119.9 ± 30.5   | 120.6 ± 30.9   |
| <b>Triglycerides</b> (mg/dL)    | 102.3 ± 48.9   | 103.1 ± 50.5   |
| <b>IL-6</b> (pg/mL)             | 2.54 ± 3.95    | 2.24 ± 3.43    |
| <b>CRP</b> (mg/mL)              | 1.43 ± 1.52    | 1.41 ± 1.61    |
| <b>EI</b> (Kcal/d)              | 1922.2 ± 623.7 | 1953.5 ± 633.5 |
| <b>TPA</b> (CPM)                | 622.2 ± 192.5  | 608.9 ± 187.9  |

Abbreviations: BMI, body mass index; CPM, counts/min; CRP, C-reactive protein; EI, energy intake; HDL-C, high-density lipoprotein-cholesterol; IL-6, interleukin 6; LCD, low-calorie diet; LDL-C, low-density lipoprotein-cholesterol; TChol, total cholesterol; TPA, total physical activity.

**Table S3** Significant changes in concentrations of metabolites after  $\geq 8\%$  weight loss

| Change in metabolite     | Metabolite                  | Mean (95%CI)            | Units                  |
|--------------------------|-----------------------------|-------------------------|------------------------|
| Decreased Concentrations | Free Cholesterol            | 0.042 (0.03, 0.05)      | mM                     |
|                          | Esterified Cholesterol      | 0.054 (0.04, 0.06)      | mM                     |
|                          | Total Cholesterol           | 0.050 (0.04, 0.06)      | mM                     |
|                          | Triglycerides               | 0.047 (0.03, 0.06)      | mM                     |
|                          | Phosphatidylcholine         | 0.042 (0.03, 0.05)      | mM                     |
|                          | Lysophosphatidylcholine     | 0.044 (0.03, 0.05)      | mM                     |
|                          | Sphingomyelin               | 0.020 (0.009, 0.03)     | mM                     |
|                          | Fatty acyl chains           | 0.040 (0.03, 0.05)      | mM                     |
|                          | Monounsaturated fatty acids | 0.006 (0.003, 0.01)     | % of fatty acid chains |
|                          | LPC 14:0                    | 0.003 (0.002, 0.004)    | $\mu\text{g/dL}$       |
|                          | LPC 20:3                    | 0.002 (0.001, 0.004)    | $\mu\text{g/dL}$       |
|                          | PC 30:0                     | 0.025 (0.02, 0.03)      | $\mu\text{g/dL}$       |
|                          | PC 32:1                     | 0.072 (0.05, 0.09)      | $\mu\text{g/dL}$       |
|                          | PC 32:2                     | 0.024 (0.02, 0.03)      | $\mu\text{g/dL}$       |
|                          | PC 33:1                     | 0.014 (0.01, 0.02)      | $\mu\text{g/dL}$       |
|                          | PC 34:4                     | 0.013 (0.01, 0.02)      | $\mu\text{g/dL}$       |
|                          | PC 35:1                     | 0.009 (0.006, 0.01)     | $\mu\text{g/dL}$       |
|                          | PC 36:1                     | 0.060 (0.04, 0.08)      | $\mu\text{g/dL}$       |
|                          | PC 36:4e                    | 0.027 (0.02, 0.04)      | $\mu\text{g/dL}$       |
|                          | PC 36:5                     | 0.049 (0.02, 0.07)      | $\mu\text{g/dL}$       |
|                          | PC 38:3                     | 0.117 (0.09, 0.13)      | $\mu\text{g/dL}$       |
|                          | PC 38:4                     | 0.031 (0.02, 0.04)      | $\mu\text{g/dL}$       |
|                          | PC 38:4e                    | 0.015 (0.01, 0.02)      | $\mu\text{g/dL}$       |
|                          | PC 40:4                     | 0.008 (0.005, 0.01)     | $\mu\text{g/dL}$       |
|                          | PC 40:6                     | 0.033 (0.02, 0.04)      | $\mu\text{g/dL}$       |
|                          | PE 36:5e                    | 0.042 (0.03, 0.05)      | $\mu\text{g/dL}$       |
|                          | PE 38:5e                    | 0.046 (0.04, 0.05)      | $\mu\text{g/dL}$       |
|                          | PE 38:6e                    | 0.039 (0.03, 0.05)      | $\mu\text{g/dL}$       |
|                          | SM 32:1                     | 0.034 (0.03, 0.04)      | $\mu\text{g/dL}$       |
|                          | SM 32:2                     | 0.003 (0.003, 0.004)    | $\mu\text{g/dL}$       |
|                          | SM 33:1                     | 0.006 (0.004, 0.008)    | $\mu\text{g/dL}$       |
|                          | SM 35:1                     | 0.002 (0.001, 0.003)    | $\mu\text{g/dL}$       |
|                          | SM 36:0                     | 0.003 (0.001, 0.004)    | $\mu\text{g/dL}$       |
|                          | SM 36:1                     | 0.012 (0.006, 0.02)     | $\mu\text{g/dL}$       |
|                          | SM 38:1                     | 0.035 (0.003)           | $\mu\text{g/dL}$       |
|                          | SM 40:1                     | 0.040 (0.03, 0.04)      | $\mu\text{g/dL}$       |
|                          | SM 40:2                     | 0.016 (0.01, 0.02)      | $\mu\text{g/dL}$       |
|                          | SM 41:1                     | 0.043 (0.04, 0.05)      | $\mu\text{g/dL}$       |
|                          | SM 41:2                     | 0.011 (0.009, 0.01)     | $\mu\text{g/dL}$       |
|                          | SM 42:1                     | 0.032 (0.02, 0.04)      | $\mu\text{g/dL}$       |
|                          | TG 50:2                     | 0.144 (0.007, 0.22)     | $\mu\text{g/dL}$       |
|                          | Lactic acid                 | 0.055 (0.03, 0.08)      | mM                     |
|                          | Glycolic acid               | 0.022 (0.01, 0.03)      | mM                     |
|                          | Valine                      | 0.027 (0.01, 0.04)      | mM                     |
|                          | Glutamate                   | 0.074 (0.05, 0.10)      | mM                     |
|                          | Glucose                     | 0.012 (0.006, 0.02)     | mM                     |
|                          | Tyrosine                    | 0.033 (0.02, 0.05)      | mM                     |
| Increased Concentrations | LPC 16:0                    | 0.027 (0.04, 0.04)      | $\mu\text{g/dL}$       |
|                          | LPC 16:1e                   | 0.002 (0.001, 0.004)    | $\mu\text{g/dL}$       |
|                          | LPC 18:1                    | 0.023 (0.01, 0.03)      | $\mu\text{g/dL}$       |
|                          | LPC 18:2                    | 0.030 (0.02, 0.04)      | $\mu\text{g/dL}$       |
|                          | LPC 20:0                    | 0.0002 (0.0001, 0.0003) | $\mu\text{g/dL}$       |
|                          | LPC 20:1                    | 0.0008 (0.0005, 0.0009) | $\mu\text{g/dL}$       |
|                          | LPC 20:4                    | 0.006 (0.004, 0.008)    | $\mu\text{g/dL}$       |
|                          | LPC 22:6                    | 0.002 (0.001, 0.003)    | $\mu\text{g/dL}$       |
|                          | PC 34:2e                    | 0.004 (0.002, 0.006)    | $\mu\text{g/dL}$       |
|                          | PC 42:5e                    | 0.002 (0.001, 0.003)    | $\mu\text{g/dL}$       |
|                          | SM 42:3                     | 0.016 (0.01, 0.02)      | $\mu\text{g/dL}$       |
|                          | Glycine                     | 0.068 (0.05, 0.08)      | mM                     |
|                          | Citric acid                 | 0.053 (0.03, 0.07)      | mM                     |

Significance was calculated using paired t-test with Bonferroni correction for 123 tests. Abbreviations: CI, confidence interval; LPC, lysophosphatidylcholine; PC, phosphatidylcholine; PE, phosphatidylethanolamine; SM, sphingomyelin; TG, triglyceride.

**Table S4** Changes in cardiometabolic parameters at 8 weeks of a low-calorie diet (LCD) per 1SD log-transformed changes in the concentrations of metabolites in a sensitivity analysis with adjustment for changes in energy intake and physical activity

| Change in metabolite between baseline and 8 weeks LCD | Change in TChol (mg/dL) | Change in LDL-C (mg/dL) | Change in HDL-C (mg/dL) | Change in Triglycerides (mg/dL) |
|-------------------------------------------------------|-------------------------|-------------------------|-------------------------|---------------------------------|
| Free Chol                                             | NA                      | NA                      | NA                      | 6.85 (1.39, 12.31)              |
| Esterified Chol                                       | NA                      | NA                      | NA                      | 5.51 (0.37, 10.64)              |
| Total Chol                                            | NA                      | NA                      | NA                      | -1.60 (-6.83, 3.64)             |
| TG                                                    | 10.66 (6.84, 14.48)*    | 6.82 (3.24, 10.39)*     | -0.87 (-2.25, 0.51)     | NA                              |
| PC                                                    | 13.19 (9.78, 16.59)*    | 9.61 (6.39, 12.82)*     | 2.05 (0.72, 3.38)       | 7.32 (1.88, 12.75)              |
| LPC                                                   | 13.29 (9.94, 16.63)*    | 8.93 (5.69, 12.18)*     | 2.52 (1.22, 3.82)*      | 8.61 (3.25, 13.97)              |
| SM                                                    | 8.88 (4.78, 12.99)*     | 8.12 (4.56, 11.68)*     | 0.24 (-1.19, 1.67)      | 2.56 (-3.21, 8.33)              |
| FAC                                                   | 14.05 (10.29, 17.80)*   | 10.03 (6.49, 13.57)*    | 0.81 (-0.68, 2.29)      | 15.60 (10.17, 21.03)**          |
| MUFA                                                  | 8.48 (5.28, 11.67)*     | 7.75 (4.93, 10.57)*     | 0.52 (-0.68, 1.72)      | 3.93 (-0.91, 8.78)              |
| LPC 14:0                                              | 5.44 (0.22, 10.65)      | 2.28 (-2.39, 6.94)      | 1.24 (-0.55, 3.03)      | 6.44 (0.78, 13.66)              |
| LPC 20:3                                              | 6.35 (2.01, 10.70)      | 4.20 (0.24, 8.15)       | 1.19 (-0.35, 2.73)      | 4.48 (-1.76, 10.71)             |
| PC 30:0                                               | 7.01 (1.76, 12.27)      | 3.20 (-1.57, 7.98)      | 0.91 (-0.94, 2.77)      | 9.93 (2.52, 17.35)              |
| PC 32:1                                               | 5.89 (1.65, 10.12)      | 1.61 (-2.27, 5.49)      | 1.18 (-0.32, 2.68)      | 12.09 (6.19, 17.98)**           |
| PC 32:2                                               | 7.07 (2.38, 11.75)      | 2.89 (-1.38, 7.16)      | 2.08 (0.48, 3.69)       | 9.38 (2.99, 15.77)              |
| PC 33:1                                               | 8.32 (3.73, 12.90)*     | 4.80 (0.60, 9.00)       | 0.25 (-1.41, 1.92)      | 13.75 (7.52, 19.99)**           |
| PC 34:4                                               | 7.69 (2.70, 12.68)      | 3.29 (-1.25, 7.82)      | 2.40 (0.70, 4.11)       | 9.51 (2.65, 16.38)              |
| PC 35:1                                               | 10.80 (6.52, 15.09)*    | 8.36 (4.50, 12.23)*     | -0.20 (-1.76, 1.36)     | 10.97 (4.93, 17.02)**           |
| PC 36:1                                               | 9.06 (4.51, 13.61)*     | 5.67 (1.47, 9.86)       | 1.05 (-0.60, 2.70)      | 9.56 (3.01, 16.12)              |
| PC 36:4e                                              | 9.51 (4.76, 14.27)*     | 8.15 (3.95, 12.36)*     | 2.56 (0.90, 4.21)       | -6.56 (-13.31, 0.19)            |
| PC 36:5                                               | 3.93 (0.22, 7.64)       | 2.39 (-0.95, 5.72)      | 0.79 (-0.50, 2.08)      | 2.24 (-2.95, 7.43)              |
| PC 38:3                                               | 10.08 (6.25, 13.90)*    | 6.68 (3.09, 10.27)*     | 0.92 (-0.51, 2.36)      | 12.78 (7.35, 18.21)*            |
| PC 38:4                                               | 6.82 (2.71, 10.93)      | 5.55 (1.65, 9.46)       | 0.25 (-1.20, 1.70)      | 7.07 (1.07, 13.08)              |
| PC 38:4e                                              | 8.23 (4.03, 12.42)*     | 7.24 (3.52, 10.97)*     | 2.13 (0.66, 3.60)       | -6.65 (-12.64, -0.66)           |
| PC 40:4                                               | 7.08 (2.56, 11.59)      | 3.68 (-0.45, 7.81)      | 1.82 (0.24, 3.39)       | 8.32 (2.04, 14.60)              |
| PC 40:6                                               | 8.10 (4.48, 11.72)*     | 5.00 (1.67, 8.33)       | 0.70 (-0.62, 2.02)      | 10.03 (4.99, 15.07)**           |
| PE 36:5e                                              | 1.59 (-2.98, 6.17)      | 1.36 (-2.70, 5.42)      | 1.13 (-0.42, 2.67)      | -3.79 (-10.06, 2.48)            |
| PE 38:5e                                              | 3.22 (-1.17, 6.93)      | 3.05 (-0.90, 6.99)      | 1.35 (-0.15, 2.85)      | -6.22 (-12.27, -0.16)           |
| PE 38:6e                                              | 4.00 (-0.90, 8.90)      | 3.05 (-1.31, 7.41)      | 2.60 (0.98, 4.22)       | -7.06 (-13.76, -0.36)           |
| SM 32:1                                               | 14.16 (10.28, 18.04)*   | 11.79 (8.29, 15.29)*    | 2.13 (0.63, 3.63)       | 1.49 (-4.74, 7.71)              |
| SM 32:2                                               | 11.20 (6.64, 15.76)*    | 8.05 (3.86, 12.25)*     | 1.86 (0.24, 3.48)       | 8.76 (2.09, 15.42)              |
| SM 33:1                                               | 12.34 (8.52, 16.17)*    | 10.99 (7.61, 14.37)*    | 1.62 (0.17, 3.07)       | -0.23 (-6.23, 5.76)             |
| SM 35:1                                               | 11.06 (7.40, 14.73)*    | 9.60 (6.36, 12.85)*     | 1.28 (-0.09, 2.66)      | -0.29 (-5.76, 5.17)             |
| SM 36:0                                               | 6.99 (1.73, 12.24)      | 7.80 (3.25, 12.35)      | -0.60 (-2.40, 1.19)     | 0.34 (-6.82, 7.50)              |
| SM 36:1                                               | 9.99 (5.97, 14.01)*     | 8.78 (5.27, 12.29)*     | 1.03 (-0.40, 2.47)      | 1.77 (-4.11, 7.65)              |
| SM 38:1                                               | 10.47 (6.95, 13.99)*    | 8.06 (4.83, 11.28)*     | 1.44 (0.12, 2.75)       | 5.90 (0.57, 11.23)              |
| SM 40:1                                               | 14.08 (10.21, 17.95)*   | 11.36 (7.81, 14.92)*    | 2.48 (1.02, 3.94)       | 6.15 (0.02, 12.28)              |

|               |                       |                      |                     |                          |
|---------------|-----------------------|----------------------|---------------------|--------------------------|
| SM 40:2       | 14.07 (10.23, 17.90)* | 11.04 (7.53, 14.55)* | 2.65 (1.21, 4.08)*  | 3.44 (-2.72, 9.60)       |
| SM 41:1       | 15.33 (11.39, 19.28)* | 12.57 (8.94, 16.20)* | 2.20 (0.64, 3.76)   | 5.88 (-0.55, 12.32)      |
| SM 41:2       | 9.32 (3.89, 14.75)    | 7.19 (2.30, 12.07)   | 1.68 (-0.21, 3.57)  | 4.74 (-2.94, 12.43)      |
| SM 42:1       | 11.96 (7.54, 16.37)*  | 8.87 (4.76, 12.97)*  | 2.44 (0.87, 4.01)   | 7.88 (1.41, 14.35)       |
| TG 50:2       | 6.41 (2.50, 10.32)*   | 4.02 (0.48, 7.56)    | -1.19 (-2.51, 0.12) | NA                       |
| Lactic acid   | 3.49 (-0.64, 7.62)    | 1.94 (-1.76, 5.64)   | 0.63 (-0.79, 2.06)  | 4.75 (-0.94, 10.45)      |
| Glycolic acid | 0.35 (-4.19, 4.90)    | -0.19 (-4.18, 3.80)  | 0.15 (-1.39, 1.69)  | -2.03 (-8.41, 4.36)      |
| Valine        | 7.98 (4.13, 11.83)*   | 6.56 (3.14, 9.99)*   | -0.25 (-1.65, 1.14) | 7.34 (1.79, 12.90)       |
| Glutamate     | -0.54 (-4.43, 3.35)   | -0.78 (-4.22, 2.66)  | -0.15 (-1.48, 1.18) | 2.04 (-3.23, 7.31)       |
| Glucose       | 1.97 (-2.27, 6.20)    | 1.65 (-2.11, 5.42)   | 0.52 (-0.92, 1.96)  | -0.81 (-6.69, 5.06)      |
| Tyrosine      | 5.52 (1.34, 9.70)     | 3.66 (-0.12, 7.43)   | 1.41 (-0.04, 2.86)  | 2.24 (-3.71, 8.19)       |
| LPC 16:0      | 5.97 (1.14, 10.80)    | 4.61 (0.29, 8.94)    | 0.70 (-0.97, 2.37)  | 1.98 (-4.80, 8.77)       |
| LPC 16:1e     | 1.24 (-2.76, 5.24)    | 1.42 (-2.13, 4.97)   | 0.43 (-0.93, 1.79)  | -4.70 (-10.20, 0.79)     |
| LPC 18:1      | 3.25 (-1.07, 7.56)    | 2.31 (-1.51, 6.13)   | 0.90 (-0.56, 2.36)  | -4.03 (-10.08, 2.02)     |
| LPC 18:2      | 2.63 (-1.30, 6.56)    | 1.71 (-1.78, 5.20)   | 1.22 (-0.11, 2.54)  | -2.97 (-8.40, 2.45)      |
| LPC 20:0      | 5.03 (0.53, 9.54)     | 4.10 (0.10, 8.11)    | 1.70 (0.17, 3.24)   | -2.99 (-9.27, 3.28)      |
| LPC 20:1      | 2.85 (-1.22, 6.91)    | 3.09 (-0.48, 6.66)   | -0.14 (-1.53, 1.24) | -2.62 (-8.25, 3.01)      |
| LPC 20:4      | 2.35 (-1.42, 6.13)    | 1.82 (-1.53, 5.17)   | 0.50 (-0.78, 1.78)  | -0.61 (-5.82, 4.61)      |
| LPC 22:6      | 2.39 (-1.03, 5.80)    | 2.22 (-0.82, 5.25)   | 0.42 (-0.74, 1.59)  | -1.63 (-6.35, 3.08)      |
| PC 34:2e      | 5.17 (0.82, 9.51)     | 3.84 (-0.05, 7.74)   | 3.31 (1.90, 4.72)*  | -10.57 (-16.42, -4.72)** |
| PC 42:5e      | 2.14 (-1.75, 6.03)    | 2.46 (-0.97, 5.90)   | 0.59 (-0.73, 1.91)  | -3.67 (-8.99, 1.66)      |
| SM 42:3       | 7.39 (3.25, 11.53)    | 7.47 (3.90, 11.04)*  | 0.22 (-1.24, 1.67)  | -1.29 (-7.20, 4.62)      |
| Glycine       | -3.50 (-7.41, 0.41)   | -2.72 (-6.18, 0.74)  | 0.80 (-0.52, 2.12)  | -4.72 (-10.14, 0.69)     |
| Citric acid   | 0.85 (-3.54, 5.25)    | 1.56 (-2.34, 5.45)   | -0.03 (-1.57, 1.50) | -3.73 (-9.83, 2.36)      |

Values presented as beta estimates (95% confidence interval) and each regression was adjusted for age, sex, body weight change, sagittal diameter change, value for the respective outcome traits at the baseline examination, and the respective metabolite at baseline, and changes in energy intake and physical activity. \*Significant after Bonferroni correction for 57 tests. \*\* Significant after Bonferroni correction for 58 tests. Abbreviations: FAC, fatty acyl chain; LPC, lysophosphatidylcholine; MUFA, monounsaturated fatty acid; PC, phosphatidylcholine; PE, phosphatidylethanolamine; SD, Standard Deviation; SM, sphingomyelin; TG, triglyceride.

**Table S5** Significant changes in concentrations of metabolites after weight loss maintenance

|                          | <b>Metabolite</b>           | <b>Mean (95%CI)</b> | <b>Units</b>           |
|--------------------------|-----------------------------|---------------------|------------------------|
| Increased Concentrations | Triglycerides               | 4.23 (4.17, 4.28)   | mM                     |
|                          | Phosphatidylcholine         | 0.53 (0.50, 0.55)   | mM                     |
|                          | Lysophosphatidylcholine     | 0.41 (0.38, 0.43)   | mM                     |
|                          | Fatty acyl chains           | 2.65 (2.63, 2.67)   | mM                     |
|                          | PC 32:1                     | 0.04 (0.02, 0.06)   | mM                     |
|                          | PC 33:1                     | 3.90 (3.89, 3.90)   | µg/dL                  |
|                          | PC 36:1                     | 4.99 (4.95, 5.03)   | µg/dL                  |
|                          | PC 36:4e                    | 4.49 (4.46, 4.51)   | µg/dL                  |
|                          | PC 38:3                     | 4.97 (4.93, 5.01)   | µg/dL                  |
|                          | PC 38:4e                    | 4.11 (4.10, 4.12)   | µg/dL                  |
|                          | SM 32:1                     | 4.29 (4.28, 4.31)   | µg/dL                  |
|                          | SM 32:2                     | 4.01 (4.009, 4.01)  | µg/dL                  |
|                          | SM 33:1                     | 4.06 (4.05, 4.06)   | µg/dL                  |
|                          | SM 38:1                     | 4.18 (4.16, 4.19)   | µg/dL                  |
|                          | SM 40:1                     | 4.23 (4.22, 4.25)   | µg/dL                  |
|                          | SM 40:2                     | 4.25 (4.24, 4.26)   | µg/dL                  |
|                          | SM 41:1                     | 4.19 (4.18, 4.20)   | µg/dL                  |
|                          | SM 41:2                     | 3.95 (3.94, 3.95)   | µg/dL                  |
|                          | SM 42:1                     | 4.06 (4.05, 4.07)   | µg/dL                  |
|                          | SM 42:3                     | 4.38 (4.37, 4.40)   | µg/dL                  |
| Decreased Concentrations | Sphingomyelin               | 0.25 (0.23, 0.28)   | mM                     |
|                          | Monounsaturated fatty acids | 0.47 (1.45, 1.48)   | % of fatty acid chains |

Significance was calculated using paired t-test with Bonferroni correction for 28 tests. Abbreviations: CI; confidence interval, LPC, lysophosphatidylcholine; PC, phosphatidylcholine; PE, phosphatidylethanolamine; SM, sphingomyelin.
